# Supplementary material
Source: PubMed Central journal article supplement (PMC4268232)
Supplement: NIHMS623835-supplement.pdf [file NIHMS623835-supplement.pdf]

Appendix A. Supplementary data

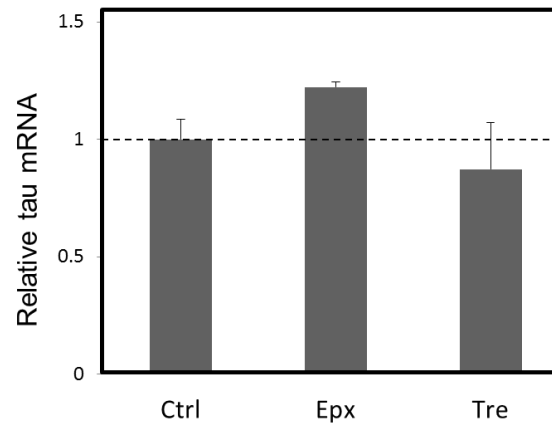

Supplementary Figure 1S: Primary cortical neurons (DIV 7) were treated with vehicle (Control, Ctrl), 8 nM epoxomicin (Epx) or 150 mM trehalose (Tre) for 12 hr and the relative mRNA level of tau was compared to that of Ctrl cells using qRT-PCR. N= 3 separate determinations. These data demonstrate that the treatments do not significantly decrease tau mRNA levels.
